# Supplementary material for: Cerium oxide standing out as an electron transport layer for efficient and stable perovskite solar cells processed at low temperature
Source: Royal Society of Chemistry journal article supplement (doi:10.1039/c6ta07541j), 2016-12-12
Supplement: c6ta07541j1.pdf [file c6ta07541j1.pdf]

## Supporting Information

### **Cerium oxide standing out as electron transport layer for efficient and stable perovskite solar cells processed in low- temperature**

Xin Wang,<sup>a</sup> Lin-Long Deng,<sup>\*a</sup> Lu-Yao Wang,<sup>a</sup> Si-Min Dai,<sup>b</sup> Zhou Xing,<sup>b</sup> Xin-Xing Zhan,<sup>b</sup> Xu-Zhai Lu,<sup>b</sup> Su-Yuan

Xie,<sup>\*b</sup> Rong-Bin Huang<sup>b</sup> and Lan-Sun Zheng<sup>b</sup>

*<sup>a</sup>Pen-Tung Sah Institute of Micro-Nano Science and Technology, Xiamen University, Xiamen 361005, China. \*E-*

*mail: denglinlong@xmu.edu.cn*

*<sup>b</sup>State Key Lab for Physical Chemistry of Solid Surfaces, iChEM (Collaborative Innovation Center of Chemistry*

*for Energy Materials), Department of Chemistry, College of Chemistry and Chemical Engineering, Xiamen*

*University, Xiamen 361005, China. \*E-mail: syxie@xmu.edu.cn*

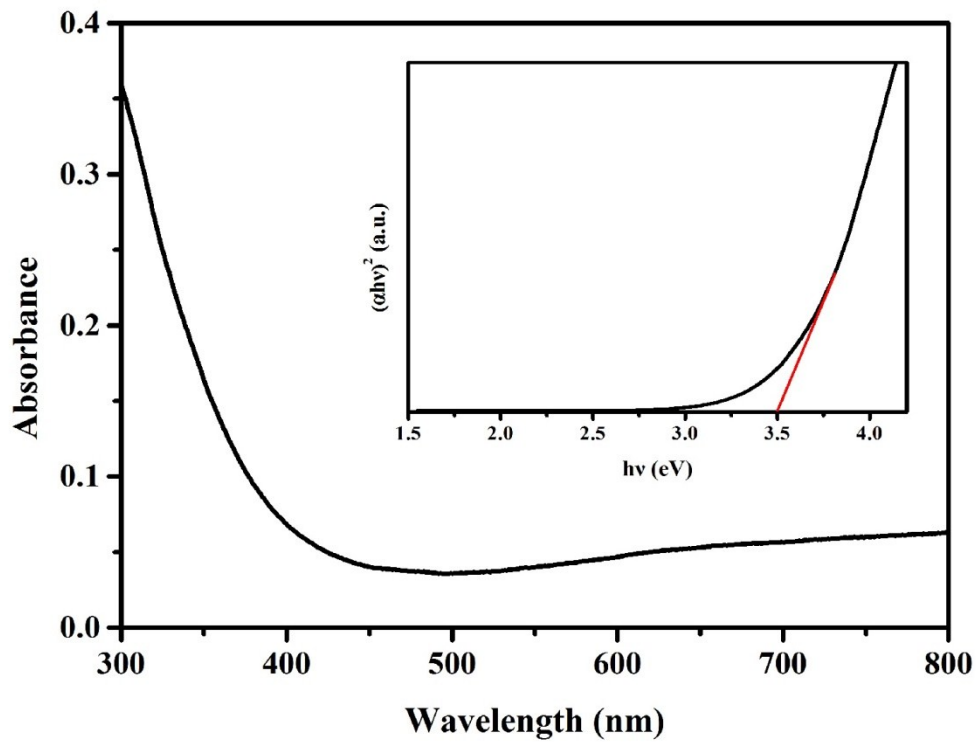

**Figure S1** UV-vis absorption spectra of  $\text{CeO}_x$  film. The inset shows the Tauc plot for band gap determination.

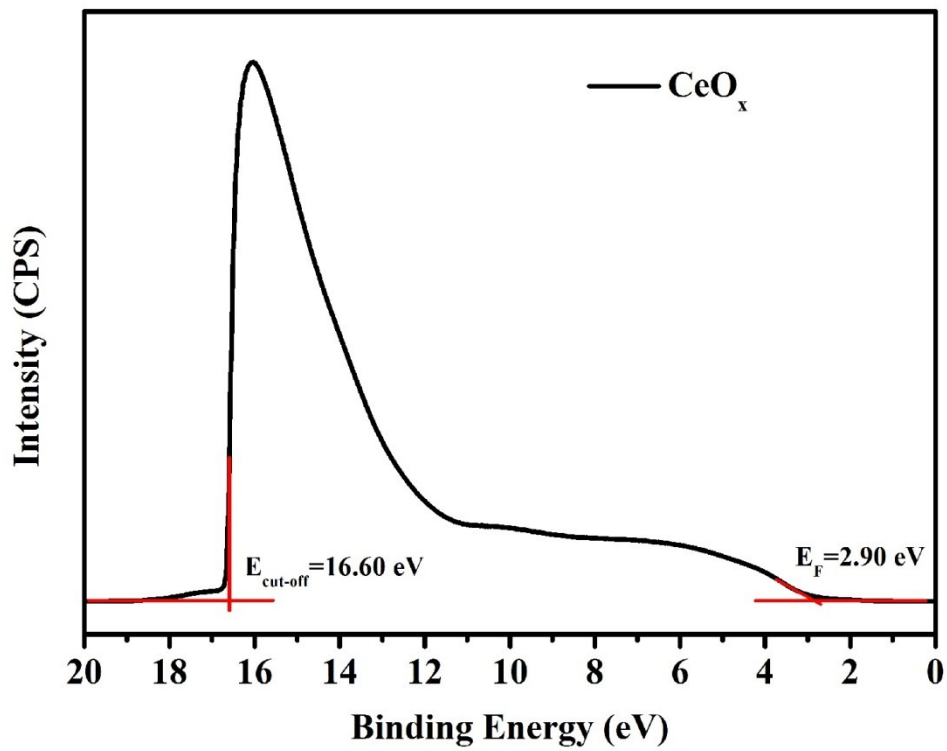

**Figure S2** UPS spectra of  $\text{CeO}_x$  film.

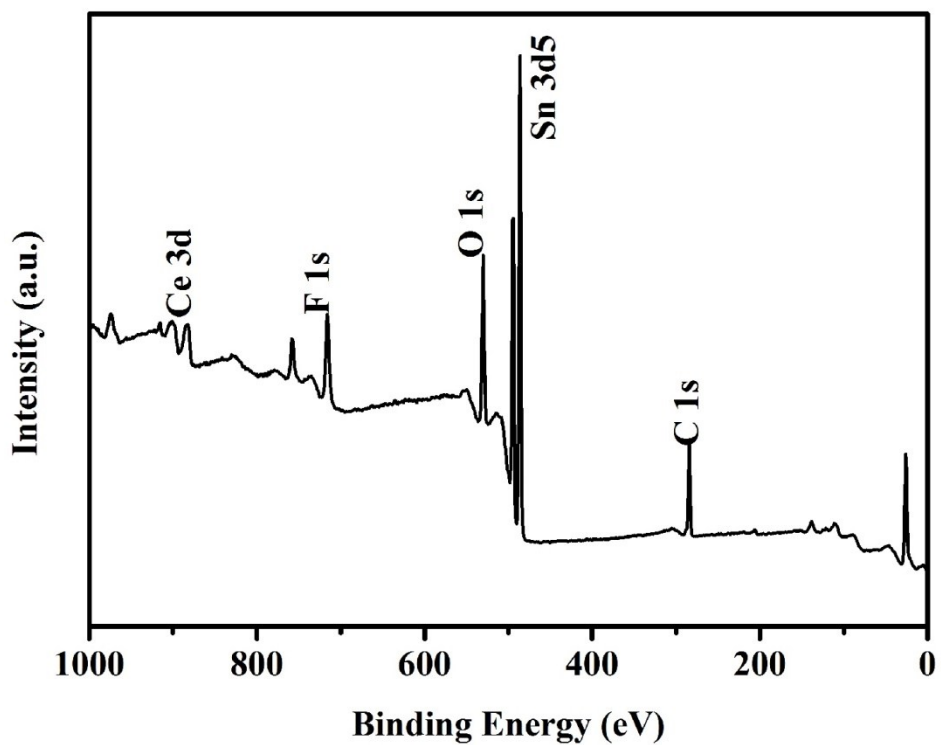

Figure S3 XPS survey scan of  $\text{CeO}_x$  film spin-coated on FTO substrate.

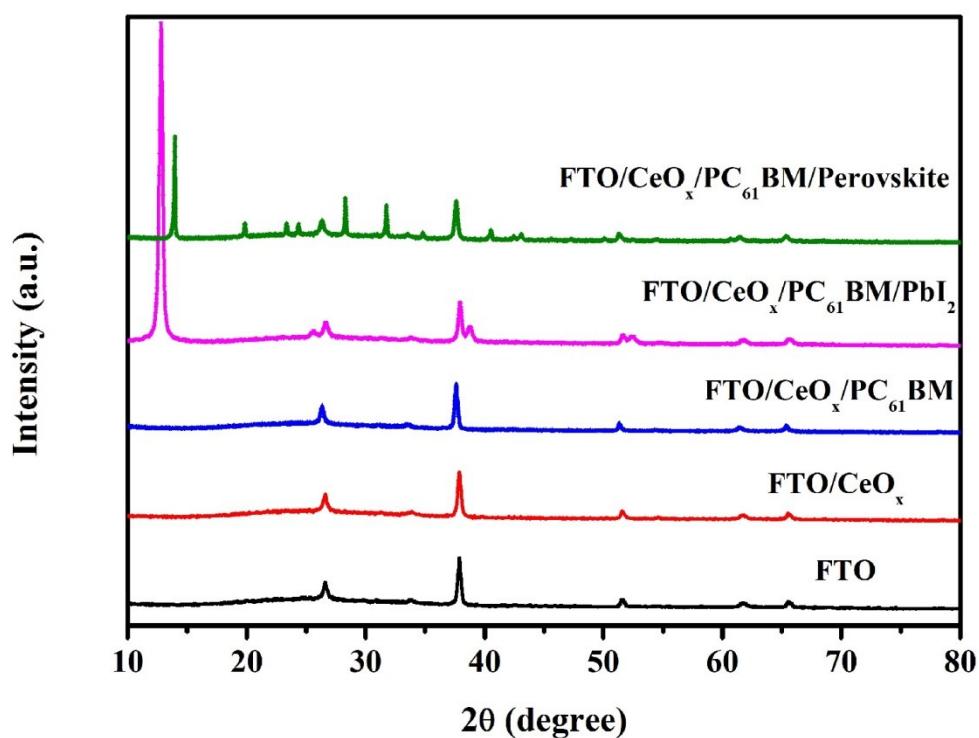

Figure S4 XRD patterns of FTO,  $\text{FTO/CeO}_x$ ,  $\text{FTO/CeO}_x/\text{PC}_{61}\text{BM}$ ,  $\text{FTO/CeO}_x/\text{PC}_{61}\text{BM}/\text{PbI}_2$ , and  $\text{FTO/CeO}_x/\text{PC}_{61}\text{BM}/\text{CH}_3\text{NH}_3\text{PbI}_3$  on glass substrates.

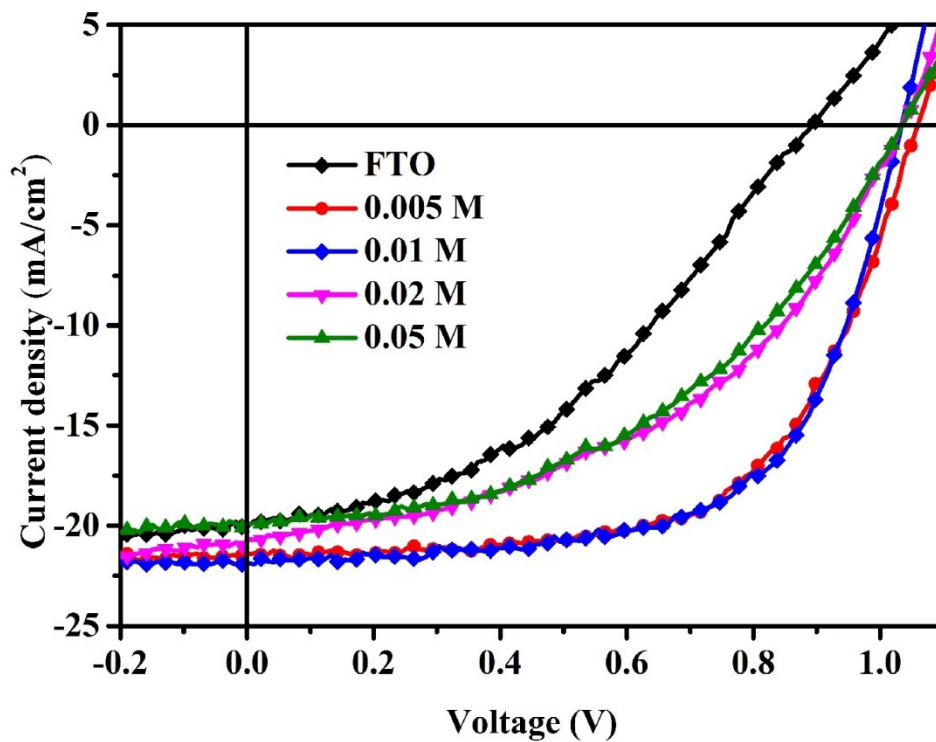

**Figure S5**  $J$ - $V$  curves of PSCs based on  $\text{CeO}_x$  ETL prepared by different precursor concentrations.

**Table S1** Photovoltaic parameters of PSCs without and with different  $\text{CeO}_x$  films.

| Molarity | $V_{oc}$ (V) | $J_{sc}$ (mA/cm <sup>2</sup> ) | FF (%) | PCE (%) |
|----------|--------------|--------------------------------|--------|---------|
| FTO      | 0.93         | 19.87                          | 41.16  | 7.61    |
| 0.005    | 1.05         | 21.44                          | 61.38  | 13.82   |
| 0.01     | 1.04         | 21.93                          | 62.79  | 14.32   |
| 0.02     | 1.03         | 20.65                          | 45.82  | 9.75    |
| 0.05     | 1.03         | 20.02                          | 45.57  | 9.40    |

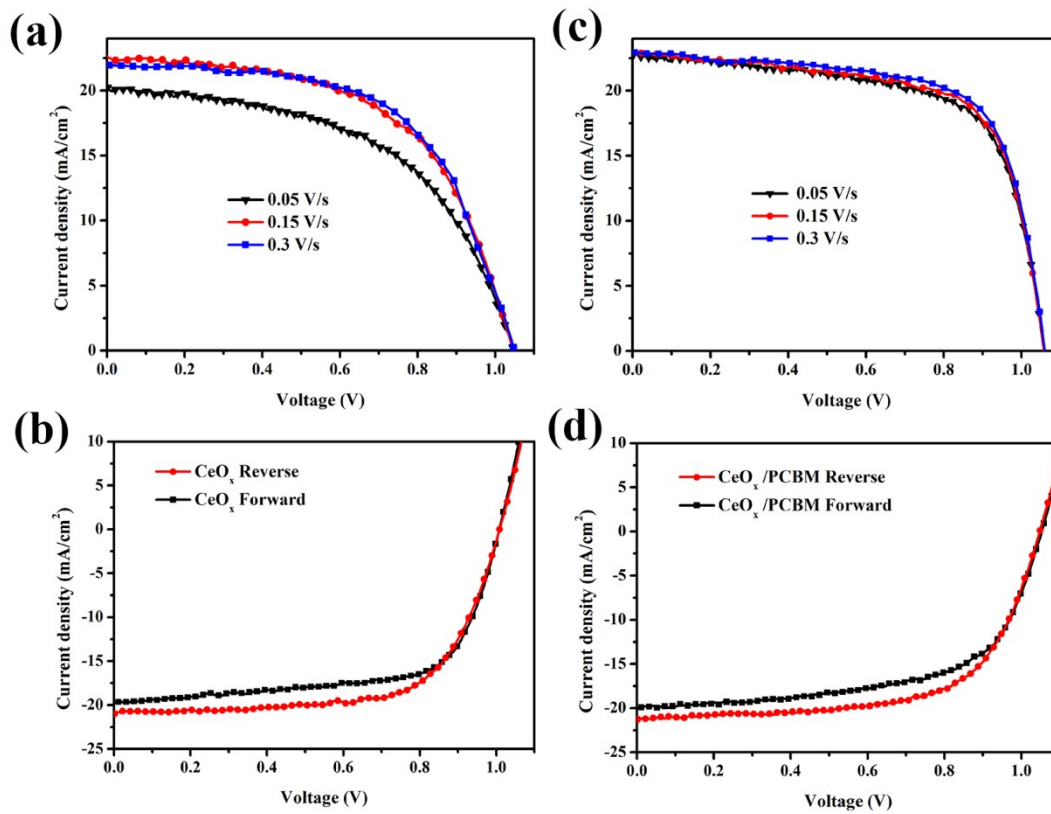

**Figure S6**  $J$ - $V$  curves of the CeO<sub>x</sub>-based PSCs without (a, b) and with (c, d) a PC<sub>61</sub>BM layer measured with different scan rates (reverse scan) and different scan directions under simulated AM1.5G 100 mWcm<sup>-2</sup> illumination.
